# Supplementary material for: Somatic copy number alterations profiling in non-small cell lung cancer and their correlation with clinical efficacy in first-line treatment
Source: Research Square preprint supplement (doi:10.21203/rs.3.rs-8056146/v1), 2025-11-13
Supplement: Supplementary file 1 [file SuppTable_S1_CohortDescription.xlsx]

## Sheet: ICI
	n=86
Age, median (SD)	68.7356	11.2223
Sex, n (%)
Male	56	0.651
Female	30	0.349
Histology, n (%)
LUAD	67	0.779
LUSC	7	0.081
Others	12	0.14
Smoking status, n (%)
ever	82	0.953
never	4	0.047
PD-L1, n (%)
<1%	22	0.255814
1-49%	6	0.0697674
50-100%	43	0.5
NA	15	0.174419
Treatment, n (%)
PD-(L)1 only	54	0.627907
Dual Checkpoint
Nivolumab+Ipilimumab	11	0.127907
Pembrolizumab+Others	21	0.244186
Brain mets at treatment initiation, n (%)	20	0.233
Liver mets at treatment initiation, n (%)	13	0.151

## Sheet: ChT
	n=107
Age, median (SD)	64.474	10.8799
Sex, n (%)
Male	67	0.626
Female	40	0.374
Histology, n (%)
LUAD	81	0.757
LUSC	10	0.0935
Others	16	0.1495
Smoking status, n (%)
ever	96	0.897
never	11	0.103
PD-L1, n (%)
<1%	43	0.401869
1-49%	13	0.121495
50-100%	13	0.121495
NA	38	0.35514
Treatment, n (%)
Carbo/cisplatin + pemetrexed	59	0.551402
Carbo/cisplatin + taxane	32	0.299065
Carbo/cisplatin + others	16	0.149533
Brain mets at treatment initiation, n (%)	22	0.206
Liver mets at treatment initiation, n (%)	23	0.215

## Sheet: ICI+ChT
	n=65
Age, median (SD)	65.2247	9.8398
Sex, n (%)
Male	48	0.738
Female	17	0.262
Histology, n (%)
LUAD	52	0.8
LUSC	7	0.108
Others	6	0.092
Smoking status, n (%)
ever	60	0.923
never	5	0.077
PD-L1, n (%)
<1%	31	0.476923
1-49%	18	0.276923
50-100%	3	0.0461538
NA	13	0.2
Treatment, n (%)
Anti-PD-(L1) + Chemo	49	0.753846
Dual Checkpoint + Chemo	16	0.246154
Brain mets at treatment initiation, n (%)	12	0.184615
Liver mets at treatment initiation, n (%)	16	0.246154
