# Supplementary material for: Somatic copy number alterations profiling in non-small cell lung cancer and their correlation with clinical efficacy in first-line treatment
Source: Research Square preprint supplement (doi:10.21203/rs.3.rs-8056146/v1), 2025-11-13
Supplement: Supplementary file 4 [file SuppFigS4.pdf › SuppFiles/SuppFigs/SuppFigS4.pdf]

**A**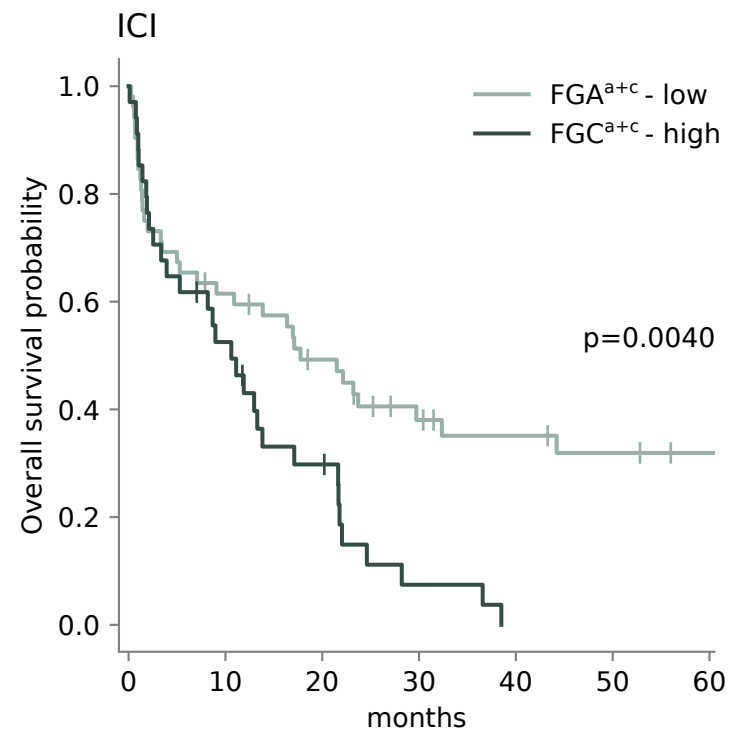

|                           | At risk |    |    |    |    |    |   |  |
|---------------------------|---------|----|----|----|----|----|---|--|
| FGA <sup>a+c</sup> - low  | 52      | 31 | 23 | 15 | 12 | 10 | 8 |  |
| FGA <sup>a+c</sup> - high | 34      | 17 | 9  | 2  | 0  | 0  | 0 |  |

**B**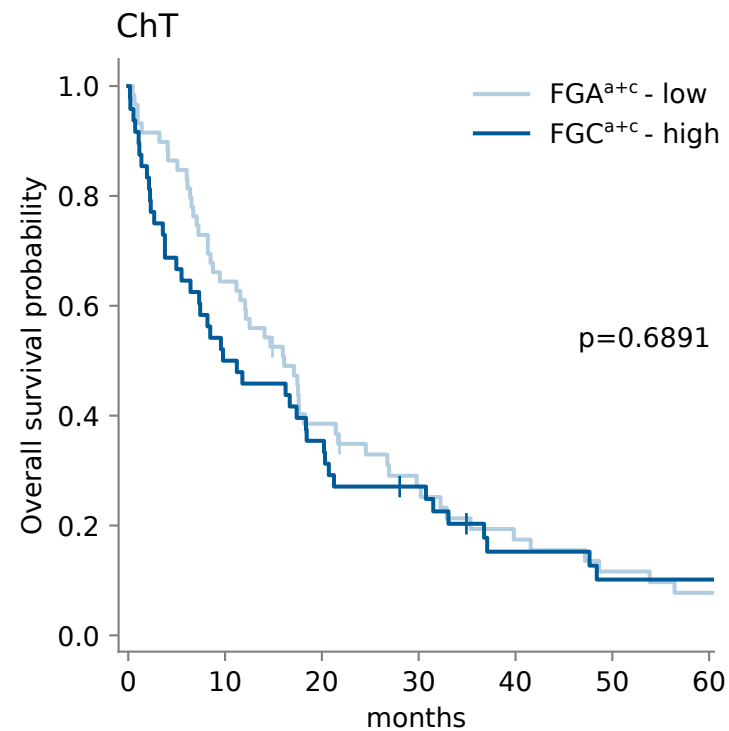

|                           | At risk |    |    |    |   |   |   |  |
|---------------------------|---------|----|----|----|---|---|---|--|
| FGA <sup>a+c</sup> - low  | 59      | 38 | 21 | 14 | 9 | 6 | 4 |  |
| FGA <sup>a+c</sup> - high | 48      | 24 | 17 | 12 | 6 | 4 | 4 |  |

**C**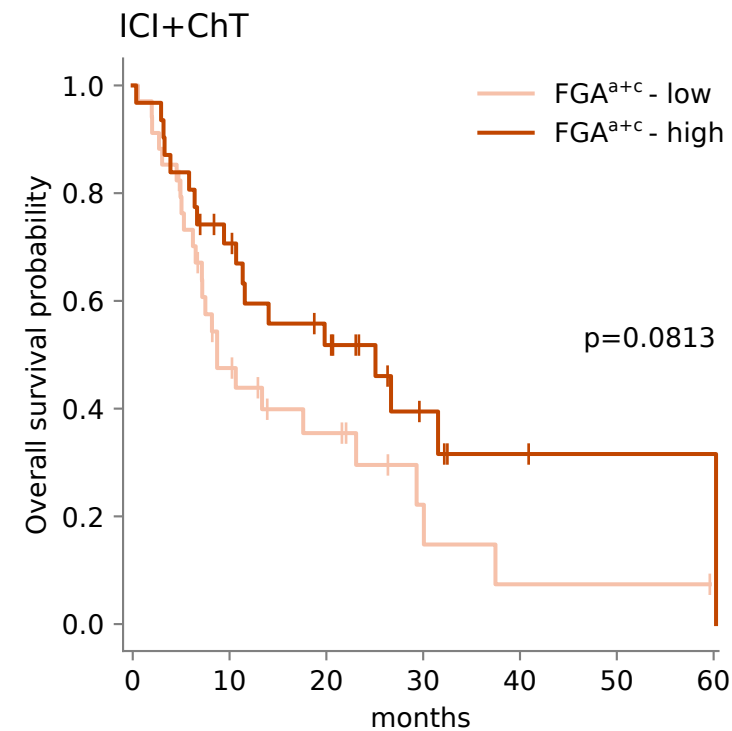

|                           | At risk |    |    |   |   |   |   |  |
|---------------------------|---------|----|----|---|---|---|---|--|
| FGA <sup>a+c</sup> - low  | 34      | 14 | 8  | 3 | 1 | 1 | 0 |  |
| FGA <sup>a+c</sup> - high | 31      | 20 | 13 | 5 | 2 | 1 | 1 |  |
