# Supplementary material for: Somatic copy number alterations profiling in non-small cell lung cancer and their correlation with clinical efficacy in first-line treatment
Source: Research Square preprint supplement (doi:10.21203/rs.3.rs-8056146/v1), 2025-11-13
Supplement: Supplementary file 5 [file SuppTable_S2_GISTIC_results.xlsx]

## Sheet: A. GISTIC_full_cohort
Unique Name	Descriptor	COSMIC genes in wide peak	Wide Peak Limits	Peak Limits	Region Limits	q values	Residual q values after removing segments shared with higher peaks
Amplification Peak 1	1p34.3	MYCL	chr1:37990001-46010000(probes 3326:4135)	chr1:39000001-40000000(probes 3428:3528)	chr1:39000001-42030000(probes 3428:3733)	0.05264	0.12086
Amplification Peak 2	1q21.2	NOTCH2, TPM3, PDE4DIP	chr1:119990001-156010000(probes 11303:11909)	chr1:120000001-151000000(probes 11304:11404)	chr1:120000001-172030000(probes 11304:13426)	1.7624e-11	4.6636e-11
Amplification Peak 3	3q26.2	MECOM	chr3:166990001-172010000(probes 57487:57993)	chr3:168000001-169000000(probes 57589:57689)	chr3:136000001-198295559(probes 54362:60512)	8.4247e-12	8.4247e-12
Amplification Peak 4	5p15.2	DROSHA	chr5:8990001-33010000(probes 78560:80682)	chr5:10000001-11000000(probes 78662:78762)	chr5:10000001-22030000(probes 78662:79573)	0.033931	0.033931
Amplification Peak 5	7q36.3		chr7:149990001-159345973(probes 122041:122545)	chr7:157000001-159345973(probes 122345:122545)	chr7:157000001-159345973(probes 122345:122545)	0.2455	0.2455
Amplification Peak 6	8q24.21	MYC	chr8:124990001-129010000(probes 134150:134555)	chr8:128000001-129000000(probes 134454:134554)	chr8:64000001-145138636(probes 128095:136168)	6.2148e-30	6.2148e-30
Amplification Peak 7	11q13.3	CCND1	chr11:66990001-72010000(probes 163399:163602)	chr11:67000001-72000000(probes 163400:163601)	chr11:65000001-91030000(probes 163198:165117)	1.8732e-05	1.8732e-05
Amplification Peak 8	12p11.23	KRAS	chr12:23990001-28010000(probes 171371:171776)	chr12:26000001-27000000(probes 171574:171674)	chr12:24000001-29030000(probes 171372:171879)	0.01627	0.01627
Amplification Peak 9	14q13.2	FOXA1, NKX2-1	chr14:32990001-38010000(probes 191653:192159)	chr14:34000001-36000000(probes 191755:191956)	chr14:1-54030000(probes 190342:193777)	1.1301e-14	1.1301e-14
Amplification Peak 10	17q25.1	DDX5, H3F3B, SRSF2, PPM1D	chr17:59990001-83257441(probes 215762:217878)	chr17:75000001-77000000(probes 217074:217275)	chr17:45000001-83257441(probes 214551:217878)	2.2716e-06	2.2716e-06
Amplification Peak 11	19q13.12		chr19:34990001-40010000(probes 227465:227971)	chr19:37000001-38000000(probes 227668:227768)	chr19:32000001-41030000(probes 227163:228074)	0.00071533	0.00071533
Deletion Peak 1	1p36.32	PRDM16,	chr1:1-8020000(probes 1:705)	chr1:1-5879999(probes 1:488)	chr1:1-23030000(probes 1:1916)	6.4002e-05	0.00010137
Deletion Peak 2	1p13.3	NOTCH2, RPL5, PDE4DIP, TRIM33, RBM15	chr1:81990001-150070000(probes 7769:11310)	chr1:107990001-109060000(probes 10192:10198)	chr1:49000001-150030000(probes 4438:11306)	1.2353e-08	2.0272e-08
Deletion Peak 3	2q37.3	ERBB4	chr2:208820001-242193529(probes 39116:42159)	chr2:237950001-242193529(probes 41954:42159)	chr2:233000001-242193529(probes 41556:42159)	0.085924	0.086618
Deletion Peak 4	3p21.31	FHIT, MITF, PPARG, TGFBR2, XPC, BAP1, FOXP1, SETD2, PBRM1	chr3:1-84639999(probes 42160:50185)	chr3:50070002-50689999(probes 47001:47061)	chr3:33000001-71030000(probes 45280:48912)	0.05977	0.05977
Deletion Peak 5	4q35.1	FAT1	chr4:173590001-190214555(probes 76205:77754)	chr4:182120002-190214555(probes 77065:77754)	chr4:159000001-190214555(probes 74733:77754)	1.6117e-07	1.6117e-07
Deletion Peak 6	5q15	APC	chr5:56950001-138040000(probes 82293:89963)	chr5:94690001-95100000(probes 85797:85837)	chr5:57000001-181538259(probes 82298:93894)	3.3006e-06	0.00035544
Deletion Peak 7	5q35.1	TLX3	chr5:149970001-181538259(probes 91067:93894)	chr5:170010002-174020000(probes 92990:93392)	chr5:57000001-181538259(probes 82298:93894)	0.00072755	0.07145
Deletion Peak 8	6q16.3	PRDM1, FOXO3	chr6:78900001-119070000(probes 101049:104798)	chr6:101380001-102090000(probes 103116:103186)	chr6:71000001-170805979(probes 100251:109835)	1.1212e-10	0.0005313
Deletion Peak 9	6q26	QKI	chr6:159900001-170805979(probes 108919:109835)	chr6:163030002-163689999(probes 109236:109300)	chr6:71000001-170805979(probes 100251:109835)	1.7166e-15	1.5647e-09
Deletion Peak 10	8p22		chr8:4990001-29070000(probes 122946:125071)	chr8:18040002-18420000(probes 123962:123998)	chr8:1-41030000(probes 122546:126279)	1.1747e-17	1.1747e-17
Deletion Peak 11	9p23	CDKN2A, CD274, PDCD1LG2	chr9:1-27949999(probes 136169:138886)	chr9:12680001-12989999(probes 137346:137375)	chr9:1-29030000(probes 136169:138996)	0.0011078	0.0011078
Deletion Peak 12	10q26.3		chr10:115940001-133797422(probes 156232:157848)	chr10:128030002-133797422(probes 157351:157848)	chr10:96000001-133797422(probes 154320:157848)	2.7521e-13	2.7521e-13
Deletion Peak 13	11p15.5		chr11:1-10310000(probes 157849:158584)	chr11:1-5010000(probes 157849:158050)	chr11:1-23030000(probes 157849:159868)	9.5249e-06	9.5249e-06
Deletion Peak 14	11q25		chr11:130910001-135086622(probes 169043:169453)	chr11:132270002-134999999(probes 169181:169452)	chr11:110000001-135086622(probes 166931:169453)	5.0541e-06	5.0541e-06
Deletion Peak 15	12p13.31		chr12:1-23180000(probes 169454:171288)	chr12:5930001-10010000(probes 169951:169958)	chr12:1-21030000(probes 169454:171071)	0.03495	0.034866
Deletion Peak 16	12q24.32	POLE	chr12:125980001-133275309(probes 180654:181260)	chr12:128010002-129230000(probes 180860:180981)	chr12:112000001-133275309(probes 179447:181260)	1.2353e-08	1.2407e-08
Deletion Peak 17	16q23.3	CBFA2T3	chr16:77980001-90338345(probes 210715:211925)	chr16:83490002-84020000(probes 211271:211323)	chr16:78000001-90338345(probes 210717:211925)	0.03444	0.034866
Deletion Peak 18	18q23	SMAD2, SMAD4	chr18:44970001-80373285(probes 221510:224741)	chr18:76110002-80373285(probes 224351:224741)	chr18:30000001-80373285(probes 219998:224741)	5.0142e-13	5.0007e-13
Deletion Peak 19	19p13.3	STK11	chr19:1-9100000(probes 224742:225556)	chr19:1-4979999(probes 224742:225139)	chr19:1-8030000(probes 224742:225448)	0.08527	0.08527

## Sheet: B. Peaks_overlap_LUAD
Peaks in LUAD from our study					Peaks in LUAD from the TCGA project
chr	start	end	description	peak	chr	start	end	description	peak
chr1	1	8020000	1p36.32	Deletion Peak 1	chr1	1	32049393	1p36.13	Deletion Peak 1
chr1	37990001	46010000	1p34.3	Amplification Peak 1	chr1	39332033	44105169	1p34.3	Amplification Peak 1
chr1	81990001	150070000	1p13.3	Deletion Peak 2	chr1	98382483	149881397	1p13.1	Deletion Peak 2
chr1	119990001	156010000	1q21.2	Amplification Peak 2	chr1	150570986	151056062	1q21.3	Amplification Peak 2
					chr2	140708948	143637838	2q22.1	Deletion Peak 3
chr2	208820001	242193529	2q37.3	Deletion Peak 3
chr3	1	84639999	3p21.31	Deletion Peak 4	chr3	1	31270358	3p26.2	Deletion Peak 4
chr3	1	84639999	3p21.31	Deletion Peak 4	chr3	42843625	62385826	3p21.31	Deletion Peak 5
chr3	166990001	172010000	3q26.2	Amplification Peak 3	chr3	168654235	171019788	3q26.2	Amplification Peak 3
					chr3	86411486	93767487	3q11.1	Deletion Peak 6
					chr3	182880112	198022430	3q29	Deletion Peak 7
chr4	173590001	190214555	4q35.1	Deletion Peak 5	chr4	177251457	191154276	4q34.3	Deletion Peak 10
					chr4	1	14496314	4p16.3	Deletion Peak 8
					chr4	55115761	59023475	4q12	Amplification Peak 4
					chr4	57892644	138441369	4q22.1	Deletion Peak 9
chr5	56950001	138040000	5q15	Deletion Peak 6	chr5	58151172	59818245	5q12.1	Deletion Peak 11
					chr5	83677261	137891389	5q31.1	Deletion Peak 12
chr5	8990001	33010000	5p15.2	Amplification Peak 4	chr5	1288616	1300024	5p15.33	Amplification Peak 5
					chr5	33498056	50133343	5p13.1	Amplification Peak 6
chr5	149970001	181538259	5q35.1	Deletion Peak 7	chr5	166764397	180915260	5q35.1	Amplification Peak 7
chr6	78900001	119070000	6q16.3	Deletion Peak 9	chr6	56256975	124125707	6q14.3	Deletion Peak 13
chr6	159900001	170805979	6q26	Deletion Peak 8	chr6	161693099	163153207	6q26	Deletion Peak 14
					chr6	41630784	42127221	6p21.1	Amplification Peak 8
					chr7	1	26479368	7p21.1	Amplification Peak 9
					chr7	54773427	55667984	7p11.2	Amplification Peak 10
					chr7	116283302	116609814	7q31.2	Amplification Peak 11
chr7	149990001	159345973	7q36.3	Amplification Peak 5
					chr8	1953486	6207718	8p23.2	Deletion Peak 15
chr8	4990001	29070000	8p22	Deletion Peak 10
					chr8	41481309	42345619	8p11.21	Amplification Peak 12
					chr8	42883855	47750537	8p11.21	Deletion Peak 16
chr8	124990001	129010000	8q24.21	Amplification Peak 6	chr8	129157821	129195260	8q24.21	Amplification Peak 13
chr9	1	27949999	9p23	Deletion Peak 11	chr9	9437437	12687261	9p23	Deletion Peak 17
chr9	1	27949999	9p23	Deletion Peak 11	chr9	21931610	22003135	9p21.3	Deletion Peak 18
					chr9	38619152	71152237	9q21.11	Deletion Peak 19
chr10	115940001	133797422	10q26.3	Deletion Peak 12	chr10	127697998	135534747	10q26.3	Deletion Peak 21
					chr10	1	2048902	10p15.3	Deletion Peak 20
					chr10	5030382	5134510	10p15.1	Amplification Peak 14
chr11	1	10310000	11p15.5	Deletion Peak 14	chr11	1	3406308	11p15.5	Deletion Peak 22
chr11	66990001	72010000	11q13.3	Amplification Peak 7	chr11	68745684	69806082	11q13.3	Amplification Peak 15
chr11	130910001	135086622	11q25	Deletion Peak 13	chr11	101778711	135006516	11q23.1	Deletion Peak 23
					chr11	126871640	135006516	11q25	Deletion Peak 24
chr12	1	23180000	12p13.31	Deletion Peak 16	chr12	7480129	18235892	12p13.2	Deletion Peak 25
chr12	23990001	28010000	12p11.23	Amplification Peak 8	chr12	25233858	25401622	12p12.1	Amplification Peak 16
					chr12	69212011	69244387	12q15	Amplification Peak 18
chr12	125980001	133275309	12q24.32	Deletion Peak 15	chr12	76351808	133851895	12q24.33	Deletion Peak 27
					chr12	33514047	39688977	12q12	Deletion Peak 26
					chr12	58133257	58208652	12q14.1	Amplification Peak 17
					chr13	1	20714074	13q12.11	Deletion Peak 28
					chr13	88532506	115169878	13q33.3	Amplification Peak 19
					chr13	112553040	115169878	13q34	Deletion Peak 29
chr14	32990001	38010000	14q13.2	Amplification Peak 9	chr14	36893517	36996019	14q13.3	Amplification Peak 20
					chr14	73030485	107349540	14q32.33	Deletion Peak 30
					chr15	1	32929863	15q11.2	Deletion Peak 31
					chr15	24927774	49006476	15q15.1	Deletion Peak 32
chr16	77980001	90338345	16q23.3	Deletion Peak 17	chr16	78098006	79299841	16q23.1	Deletion Peak 34
chr16	77980001	90338345	16q23.3	Deletion Peak 17	chr16	87349800	90354753	16q24.3	Deletion Peak 35
					chr16	1	2061465	16p13.3	Deletion Peak 33
					chr16	29426413	31297449	16p11.2	Amplification Peak 21
					chr17	1	3301779	17p13.3	Deletion Peak 36
					chr17	37804811	37917511	17q12	Amplification Peak 22
					chr17	57921224	57958614	17q23.1	Amplification Peak 23
chr17	59990001	83257441	17q25.1	Amplification Peak 10
chr18	44970001	80373285	18q23	Deletion Peak 18	chr18	47343760	60328268	18q21.32	Deletion Peak 37
chr18	44970001	80373285	18q23	Deletion Peak 18	chr18	64748327	78077248	18q23	Deletion Peak 38
					chr18	19442767	22758805	18q11.2	Amplification Peak 24
chr19	1	9100000	19p13.3	Deletion Peak 19	chr19	1	437820	19p13.3	Deletion Peak 39
					chr19	11040707	11207540	19p13.2	Deletion Peak 40
chr19	34990001	40010000	19q13.12	Amplification Peak 11	chr19	30029296	30607983	19q12	Amplification Peak 25
					chr19	46521254	50374495	19q13.33	Deletion Peak 41
					chr20	62157760	63025520	20q13.33	Amplification Peak 27
					chr20	1	17924213	20p13	Deletion Peak 42
					chr20	21734759	30731471	20p11.21	Amplification Peak 26
					chr20	36033090	50401160	20q13.12	Deletion Peak 43
					chr21	1	16335988	21q11.2	Deletion Peak 44
					chr22	22100719	23816427	22q11.22	Amplification Peak 28
					chr22	46723702	51304566	22q13.32	Deletion Peak 45
