# Supplementary material for: Somatic copy number alterations profiling in non-small cell lung cancer and their correlation with clinical efficacy in first-line treatment
Source: Research Square preprint supplement (doi:10.21203/rs.3.rs-8056146/v1), 2025-11-13
Supplement: Supplementary file 9 [file SuppTable_S3_Multivariate_FGAac_cutoff.xlsx]

## Sheet: A. multiv_cox_FGAa+c_ICI_n71
Covariate	Hazard ratio (HR)	HR lower 95%	HR upper 95%	p-value	-log2(p-value)
Sex (female)	1.21	0.63	2.33	0.57	0.82
Age at 1st line treatment	1.02	0.99	1.05	0.26	1.94
Smoking status (ever smoker)	0.48	0.12	1.93	0.3	1.74
FGAa+c (above 4,25)	1.87	1.08	3.25	0.03	5.29
PD-L1 (>=50%)	0.67	0.38	1.18	0.16	2.62
Histology (LUSC)	2.02	0.59	6.97	0.26	1.92
Metastasis in liver/brain (yes)	1.08	0.59	2.01	0.8	0.33
This multivariate Cox PH analysis includes only those samples from the group of patients treated with ICI with a PD-L1 determination available (71 out of 86)

## Sheet: B. multiv_cox_FGAa+c_ICI_n86
Covariate	Hazard ratio (HR)	HR lower 95%	HR upper 95%	p-value	-log2(p-value)
Sex (female)	1.31	0.74	2.31	0.35	1.52
Age at 1st line treatment	1.01	0.99	1.04	0.36	1.49
Smoking status (ever smoker)	0.72	0.22	2.42	0.6	0.74
FGAa+c (above 4.25)	1.98	1.19	3.3	0.01	6.81
Histology (LUSC)	0.91	0.35	2.38	0.85	0.23
Metastasis in liver/brain (yes)	1.2	0.7	2.05	0.5	0.99
This multivariate Cox PH analysis includes the 86 samples from the group of patients treated with ICI, but does not account for the effect of PD-L1.
