# Supplementary material for: Somatic copy number alterations profiling in non-small cell lung cancer and their correlation with clinical efficacy in first-line treatment
Source: Research Square preprint supplement (doi:10.21203/rs.3.rs-8056146/v1), 2025-11-13
Supplement: Supplementary file 13 [file SuppTable_S4_CoxAnalyses_perArm_and_peak.xlsx]

## Sheet: A. UnivariatePerArm
Arm-level event	Hazard ratio (HR)	HR lower 95%	HR upper 95%	p-value	-log2(p-value)	Event freq.	N total
1p_loss	1.3249	0.6928	2.5335	0.395	1.34	15	86
1p_gain	2.0518	1.1238	3.7462	0.0193	5.6958	15	86
1q_loss	na	na	na	na	na	2	86
1q_gain	1.3935	0.863	2.25	0.1747	2.5169	38	86
2p_loss	na	na	na	na	na	1	86
2p_gain	1.4341	0.8609	2.3891	0.1662	2.5893	24	86
2q_loss	na	na	na	na	na	2	86
2q_gain	1.5654	0.9244	2.6509	0.0954	3.3893	23	86
3p_loss	1.1988	0.7232	1.9871	0.482	1.0529	29	86
3p_gain	0.7885	0.3655	1.7011	0.5446	0.8766	11	86
3q_loss	1.2552	0.6405	2.4599	0.5079	0.9774	13	86
3q_gain	1.2878	0.7447	2.2269	0.3654	1.4526	23	86
4p_loss	1.0492	0.6196	1.7769	0.858	0.2209	29	86
4p_gain	1.2394	0.6402	2.3993	0.5243	0.9314	14	86
4q_loss	0.8675	0.4991	1.5081	0.6145	0.7026	26	86
4q_gain	1.2311	0.6753	2.2443	0.4973	1.0077	18	86
5p_loss	na	na	na	na	na	6	86
5p_gain	0.6015	0.368	0.9831	0.0426	4.5539	49	86
5q_loss	0.7552	0.4352	1.3105	0.3181	1.6526	28	86
5q_gain	1.0452	0.5852	1.8667	0.8813	0.1822	21	86
6p_loss	0.6958	0.3559	1.3601	0.2888	1.7918	18	86
6p_gain	1.3205	0.787	2.2159	0.2924	1.7737	32	86
6q_loss	0.9	0.5436	1.4903	0.6823	0.5516	41	86
6q_gain	1.4517	0.6825	3.0878	0.3331	1.586	11	86
7p_loss	0.6127	0.2642	1.4207	0.2536	1.9793	11	86
7p_gain	1.111	0.6702	1.8418	0.6832	0.5496	45	86
7q_loss	na	na	na	na	na	10	86
7q_gain	1.1033	0.6643	1.8324	0.7041	0.5061	46	86
8p_loss	0.9926	0.5928	1.6621	0.9774	0.0329	44	86
8p_gain	0.9232	0.4533	1.8804	0.8258	0.2761	14	86
8q_loss	1.1637	0.6035	2.2437	0.6509	0.6194	15	86
8q_gain	0.872	0.5209	1.4597	0.6023	0.7314	38	86
9p_loss	1.3859	0.8167	2.3519	0.2265	2.1425	47	86
9p_gain	0.9336	0.4287	2.0335	0.8627	0.213	11	86
9q_loss	1.2708	0.7402	2.1818	0.3849	1.3775	48	86
9q_gain	1.1693	0.5464	2.5026	0.687	0.5417	12	86
10p_loss	1.3553	0.7552	2.4322	0.3082	1.6981	23	86
10p_gain	2.0393	1.1652	3.5692	0.0126	6.3117	24	86
10q_loss	1.0695	0.6203	1.8439	0.809	0.3058	27	86
10q_gain	1.844	0.9951	3.4171	0.0518	4.2697	17	86
11p_loss	0.9552	0.5657	1.613	0.864	0.2109	31	86
11p_gain	1.596	0.8455	3.0125	0.1492	2.7444	16	86
11q_loss	0.9892	0.5422	1.8045	0.9716	0.0415	18	86
11q_gain	1.5197	0.8559	2.6983	0.153	2.7081	19	86
12p_loss	1.5664	0.8163	3.006	0.1772	2.4967	17	86
12p_gain	1.1786	0.6948	1.9993	0.5422	0.883	36	86
12q_loss	1.7599	0.8638	3.5857	0.1195	3.0645	12	86
12q_gain	1.553	0.9332	2.5844	0.0903	3.4694	32	86
13q_loss	0.919	0.5455	1.5484	0.7511	0.4129	29	86
13q_gain	na	na	na	na	na	7	86
14q_loss	na	na	na	na	na	9	86
14q_gain	2.8926	1.6372	5.1104	0.0003	11.9404	19	86
15q_loss	0.5382	0.3185	0.9094	0.0206	5.599	30	86
15q_gain	na	na	na	na	na	7	86
16p_loss	1.1366	0.6522	1.9808	0.6513	0.6185	23	86
16p_gain	1.096	0.6007	1.9994	0.7651	0.3862	19	86
16q_loss	1.0119	0.5971	1.715	0.9649	0.0516	29	86
16q_gain	1.3396	0.7068	2.539	0.3701	1.4338	16	86
17p_loss	1.2329	0.6987	2.1754	0.47	1.0893	18	86
17p_gain	1.6416	0.8421	3.1999	0.1455	2.7805	13	86
17q_loss	1.3101	0.663	2.5885	0.437	1.1944	13	86
17q_gain	1.1536	0.6897	1.9294	0.5861	0.7708	37	86
18p_loss	1.0433	0.6094	1.7862	0.8771	0.1892	30	86
18p_gain	1.2296	0.6667	2.2677	0.5081	0.9769	20	86
18q_loss	1.1297	0.6758	1.8885	0.6417	0.6399	40	86
18q_gain	1.3361	0.6537	2.731	0.4269	1.228	13	86
19p_loss	1.3323	0.772	2.2992	0.3028	1.7238	38	86
19p_gain	1.1452	0.5996	2.1872	0.6813	0.5536	19	86
19q_loss	1.6601	0.9107	3.0262	0.098	3.3507	21	86
19q_gain	1.2223	0.71	2.1043	0.4689	1.0926	31	86
20p_loss	0.5293	0.2801	1.0003	0.0501	4.3183	18	86
20p_gain	0.7054	0.4167	1.1942	0.1939	2.3666	32	86
20q_loss	na	na	na	na	na	10	86
20q_gain	0.8764	0.5362	1.4324	0.5986	0.7404	39	86
21q_loss	0.9065	0.5484	1.4984	0.7019	0.5107	31	86
21q_gain	0.7316	0.3397	1.5757	0.4246	1.2358	12	86
22q_loss	0.954	0.559	1.6279	0.8628	0.2128	28	86
22q_gain	1.1961	0.6414	2.2306	0.5733	0.8026	15	86

## Sheet: B. MultivariatePerArm
Multivariate Cox PH test for progression free survival in the group of patients treated with ICI with arm-level gains of 1p.
Covariates	Hazard ratio (HR)	HR lower 95%	HR upper 95%	p-value	-log2(p-value)	Event freq.	N total
1p_loss	1.0851	0.5474	2.1509	0.8151	0.295	15	86
1p_gain	1.6116	0.8363	3.1055	0.1539	2.6998	15	86
FGAa+c (above 4.25)	1.6693	0.9662	2.8838	0.0662	3.9163
Multivariate Cox PH test for progression free survival in the group of patients treated with ICI with arm-level gains of 5p.
Covariates	Hazard ratio (HR)	HR lower 95%	HR upper 95%	p-value	-log2(p-value)	Event freq.	N total
5p_loss	0.4991	0.1888	1.3189	0.161	2.635	6	86
5p_gain	0.5881	0.3596	0.9616	0.0344	4.8631	49	86
FGAa+c (above 4.25)	1.9537	1.197	3.1889	0.0074	7.0821
Multivariate Cox PH test for progression free survival in the group of patients treated with ICI with arm-level gains of 14q.
Covariates	Hazard ratio (HR)	HR lower 95%	HR upper 95%	p-value	-log2(p-value)	Event freq.	N total
14q_loss	1.0277	0.4566	2.3129	0.9474	0.0779	9	86
14q_gain	2.3878	1.2726	4.4804	0.0067	7.2186	19	86
FGAa+c (above 4.25)	1.4599	0.8463	2.5184	0.1738	2.5245
Multivariate Cox PH test for progression free survival in the group of patients treated with ICI with arm-level losses of 15q.
Covariates	Hazard ratio (HR)	HR lower 95%	HR upper 95%	p-value	-log2(p-value)	Event freq.	N total
15q_loss	0.4763	0.2796	0.8115	0.0064	7.2949	30	86
15q_gain	0.8164	0.3463	1.9246	0.643	0.6371	7	86
FGAa+c (above 4.25)	2.1408	1.2964	3.5351	0.0029	8.4124

## Sheet: C. UnivariatePerPeak
Covariates	Wide peak limits	Hazard ratio (HR)	HR lower 95%	HR upper 95%	p-value	-log2(p-value)	Peak frequency	N total
Amplification Peak 1	chr1:37990001-46010000	1.1255	0.6747	1.8774	0.6506	0.6202	24	86
Amplification Peak 2	chr1:119990001-156010000	1.0854	0.6204	1.8987	0.7741	0.3695	65	86
Amplification Peak 3	chr3:166990001-172010000	0.6995	0.4344	1.1263	0.1414	2.8217	42	86
Amplification Peak 4	chr5:8990001-33010000	1.0373	0.6262	1.7183	0.8868	0.1733	61	86
Amplification Peak 5	chr7:149990001-159345973	1.0669	0.6627	1.7175	0.7899	0.3402	51	86
Amplification Peak 6	chr8:124990001-129010000	1.0301	0.6212	1.7083	0.9084	0.1386	61	86
Amplification Peak 7	chr11:66990001-72010000	1.4407	0.8755	2.3707	0.1508	2.7292	27	86
Amplification Peak 8	chr12:23990001-28010000	1.165	0.727	1.867	0.5256	0.928	47	86
Amplification Peak 9	chr14:32990001-38010000	1.04	0.6517	1.6595	0.8695	0.2017	40	86
Amplification Peak 10	chr17:59990001-83257441	1.0622	0.6595	1.711	0.8039	0.3149	54	86
Amplification Peak 11	chr19:34990001-40010000	0.7781	0.4861	1.2455	0.2959	1.7569	44	86
Deletion Peak 1	chr1:1-8020000	1.617	0.9869	2.6496	0.0564	4.1469	30	86
Deletion Peak 2	chr1:81990001-150070000	1.3915	0.8705	2.2242	0.1674	2.5785	38	86
Deletion Peak 3	chr2:208820001-242193529	1.4115	0.8056	2.4733	0.2284	2.1304	17	86
Deletion Peak 4	chr3:1-84639999	1.1929	0.7381	1.9279	0.4716	1.0845	50	86
Deletion Peak 5	chr4:173590001-190214555	1.0579	0.6599	1.696	0.8151	0.295	39	86
Deletion Peak 6	chr5:56950001-138040000	0.9296	0.5798	1.4904	0.7618	0.3925	40	86
Deletion Peak 7	chr5:149970001-181538259	0.907	0.5613	1.4655	0.69	0.5353	33	86
Deletion Peak 8	chr6:78900001-119070000	1.0008	0.6117	1.6375	0.9975	0.0036	56	86
Deletion Peak 9	chr6:159900001-170805979	0.8583	0.52	1.4166	0.55	0.8626	59	86
Deletion Peak 10	chr8:4990001-29070000	0.6961	0.4315	1.1229	0.1376	2.8614	54	86
Deletion Peak 11	chr9:1-27949999	1.6398	1.0067	2.6711	0.0469	4.4128	52	86
Deletion Peak 12	chr10:115940001-133797422	0.9592	0.6003	1.5327	0.8618	0.2146	41	86
Deletion Peak 13	chr11:1-10310000	1.0723	0.6706	1.7147	0.7707	0.3758	40	86
Deletion Peak 14	chr11:130910001-135086622	1.0795	0.6696	1.7404	0.7535	0.4084	34	86
Deletion Peak 15	chr12:1-23180000	1.6043	0.9695	2.6546	0.0658	3.9249	28	86
Deletion Peak 16	chr12:125980001-133275309	1.6344	0.995	2.6847	0.0524	4.2554	29	86
Deletion Peak 17	chr16:77980001-90338345	1.0005	0.6198	1.6151	0.9984	0.0023	35	86
Deletion Peak 18	chr18:44970001-80373285	1.2349	0.7478	2.0392	0.4097	1.2874	56	86
Deletion Peak 19	chr19:1-9100000	1.0129	0.6323	1.6225	0.9576	0.0625	47	86

## Sheet: D. MultivariatePerPeak
Multivariate Cox PH test for progression free survival in the group of patients treated with ICI with deletion in chr9:1-27,110,000.
Covariates	Hazard ratio (HR)	HR lower 95%	HR upper 95%	p-value	-log2(p-value)	Peak frequency	N total
loss in chr9:1-27949999	1.7768	1.0829	2.9153	0.0229	5.449	52	86
FGAa+c (above 4.25)	2.0392	1.2371	3.3613	0.0052	7.5875	52	86
