# Supplementary figures and images for: Somatic copy number alterations profiling in non-small cell lung cancer and their correlation with clinical efficacy in first-line treatment
Source: Research Square preprint supplement (doi:10.21203/rs.3.rs-8056146/v1), 2025-11-13

**A**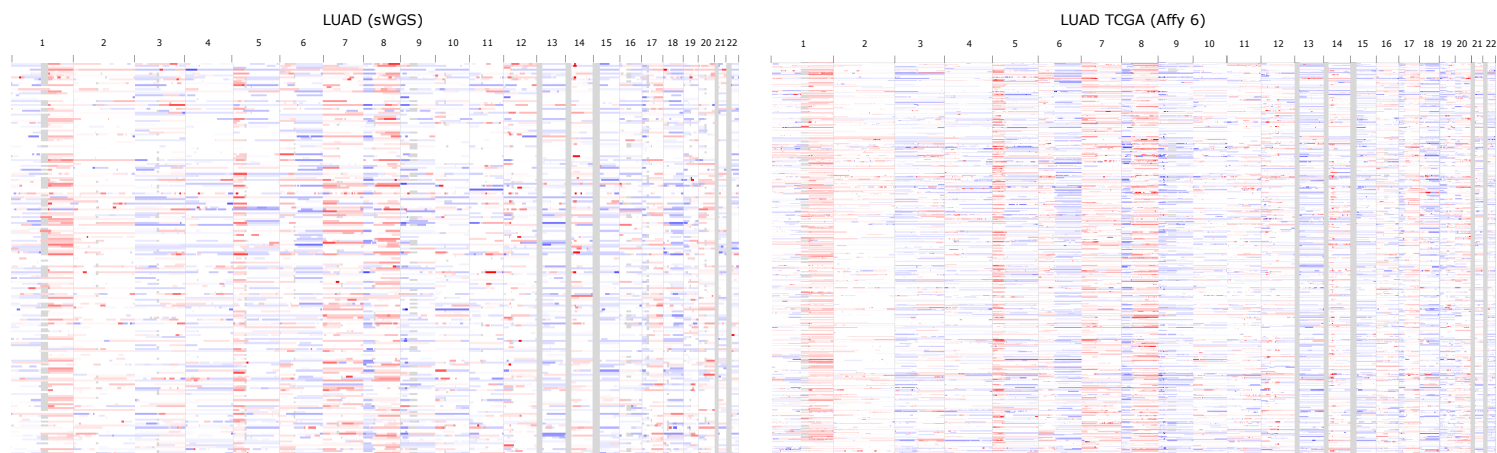

Frequency of arm-level events

**B**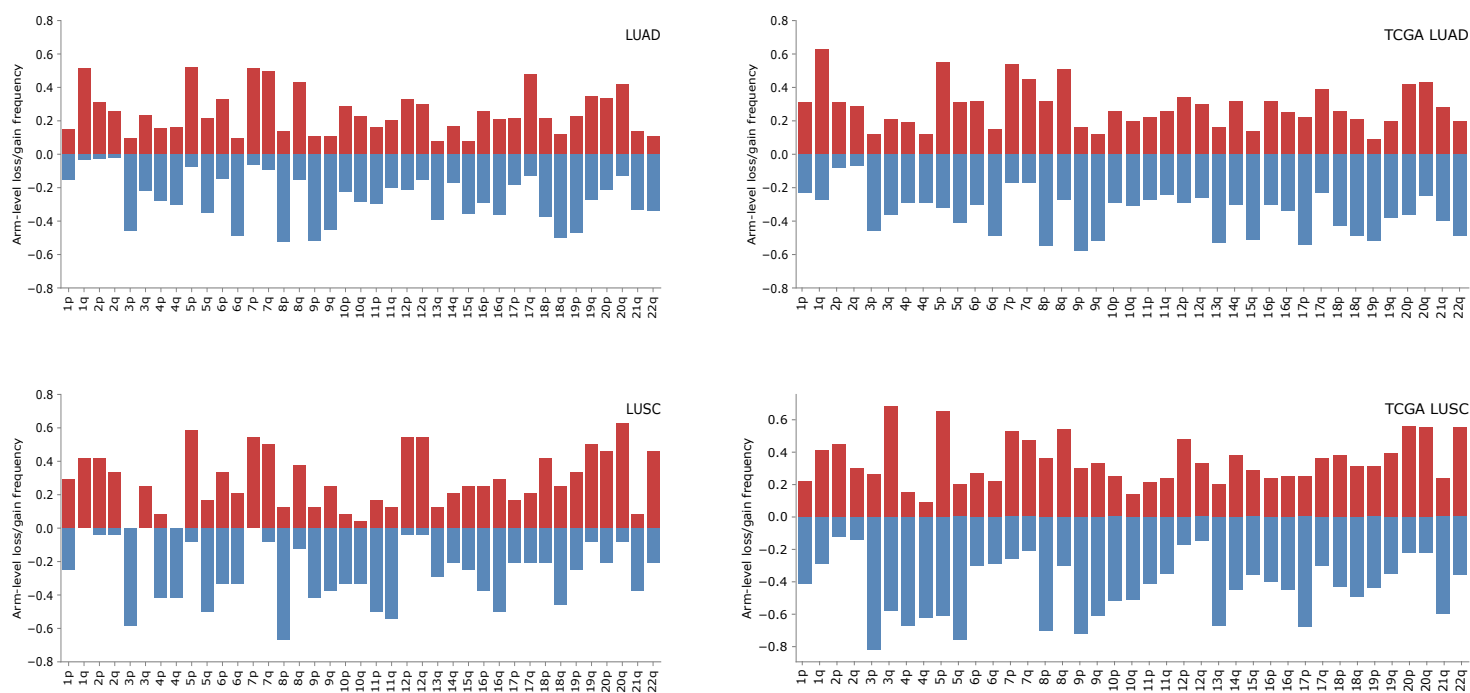**C**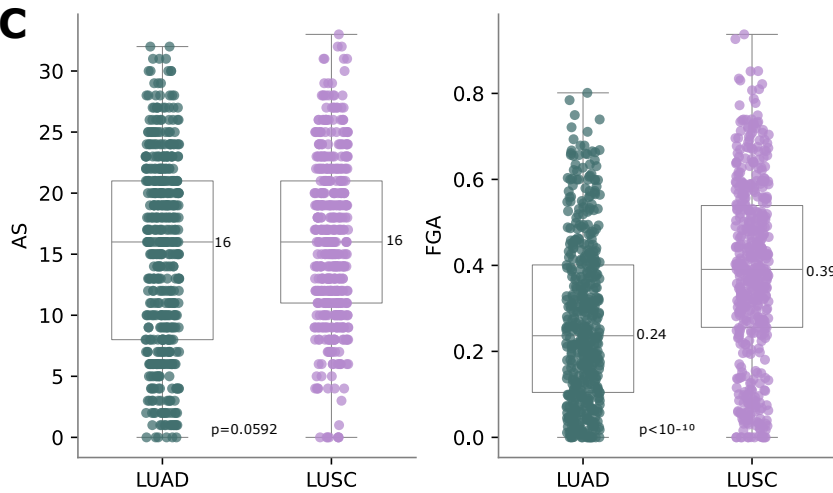**D**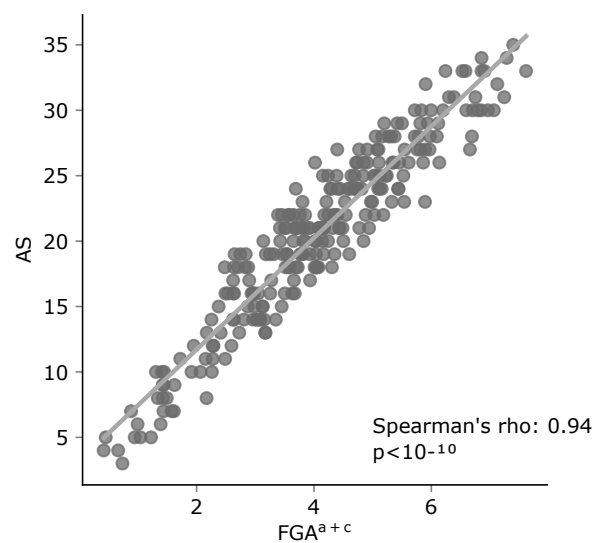

Supplement: Supplementary file 1 [file SuppFigS1.pdf › SuppFiles/SuppFigs/SuppFigS1.pdf]

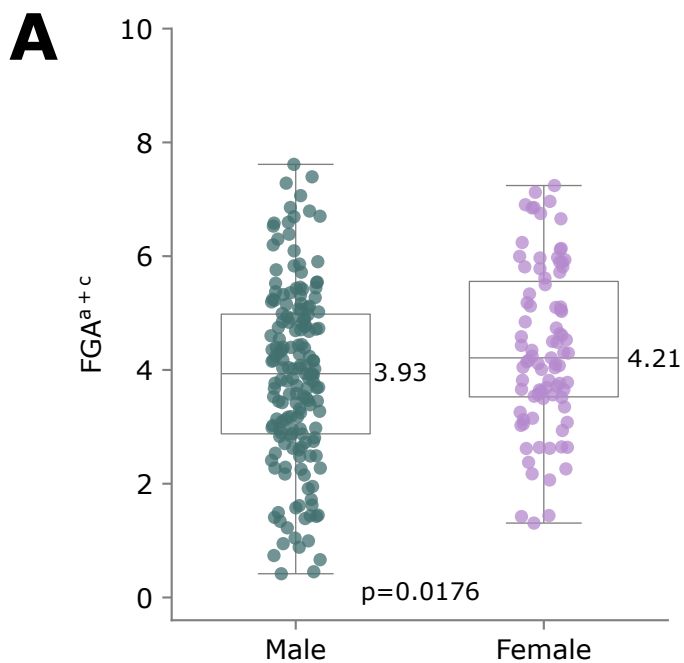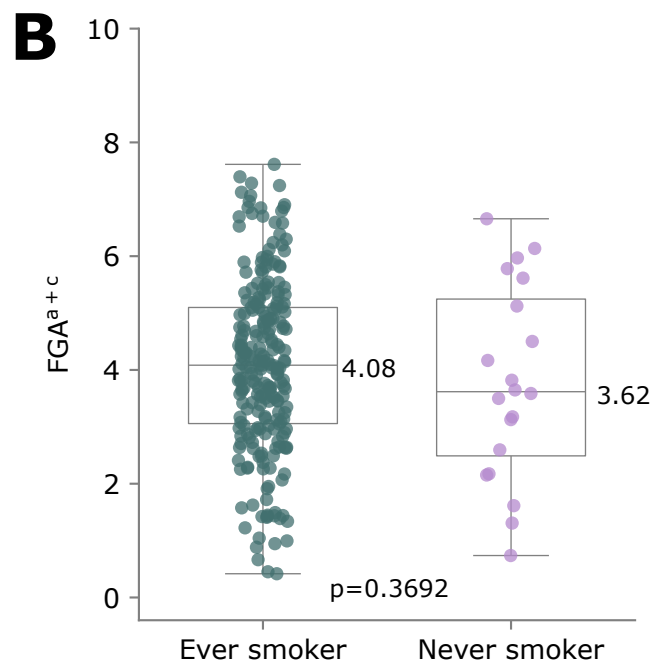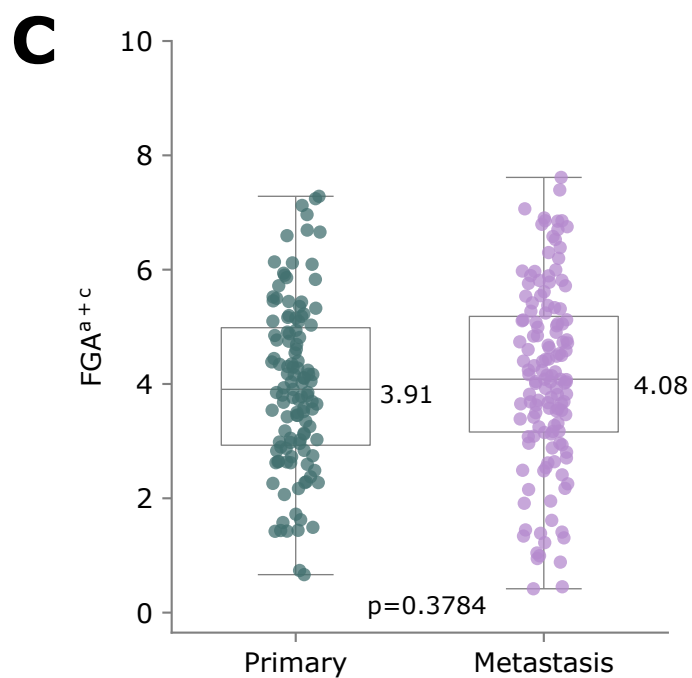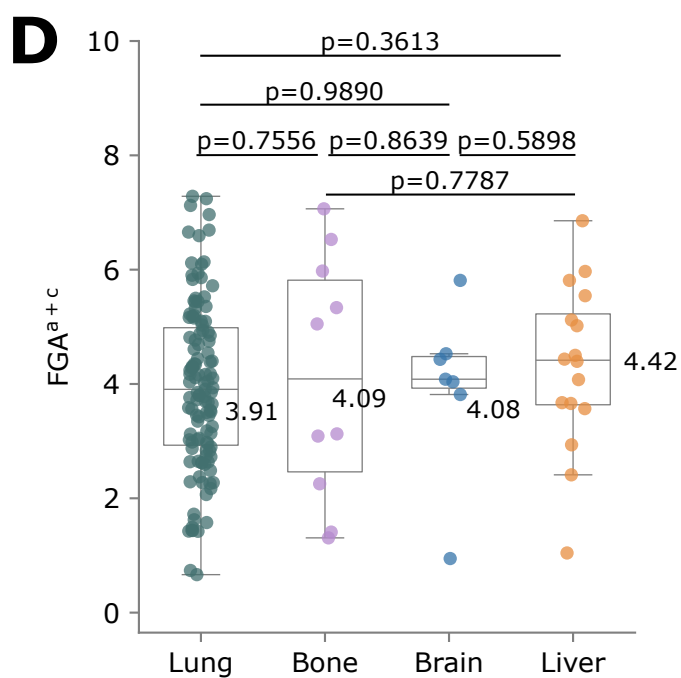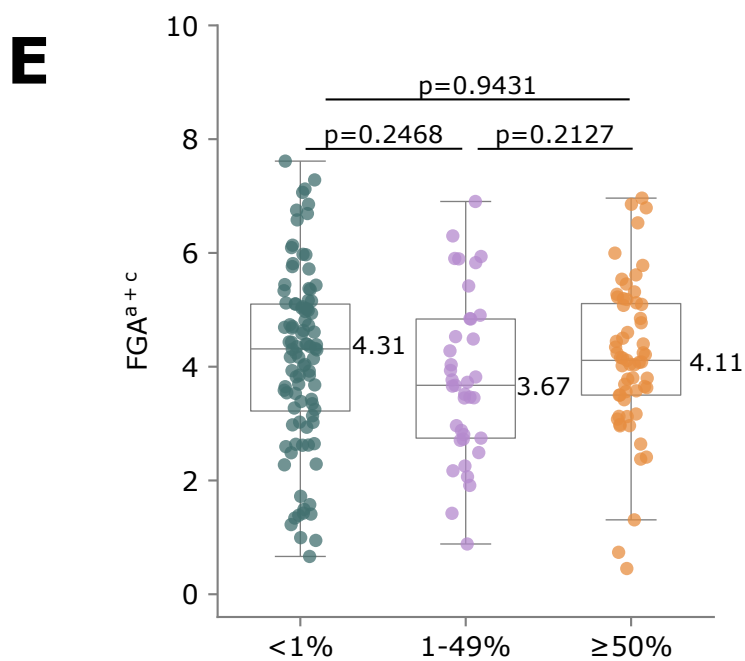

Supplement: Supplementary file 2 [file SuppFigS2.pdf › SuppFiles/SuppFigs/SuppFigS2.pdf]

**A**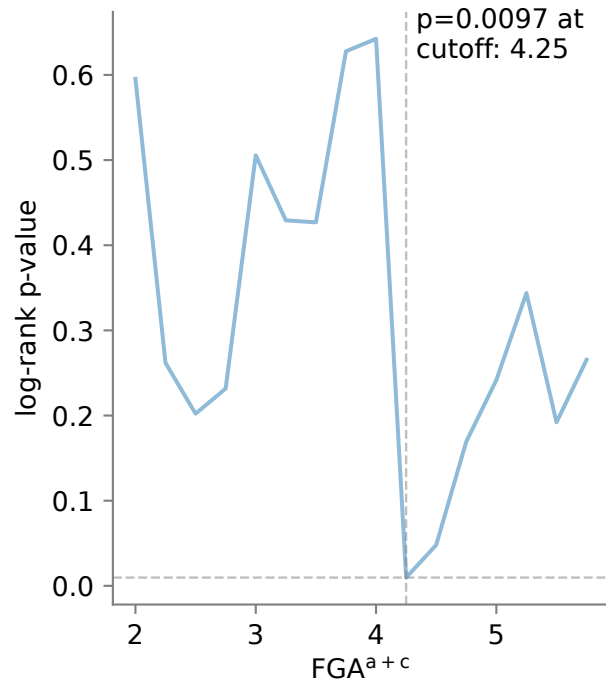**B**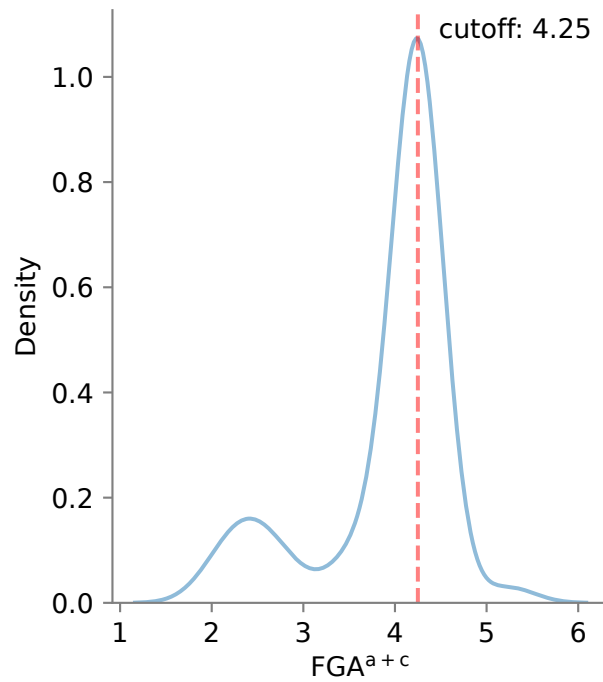**C**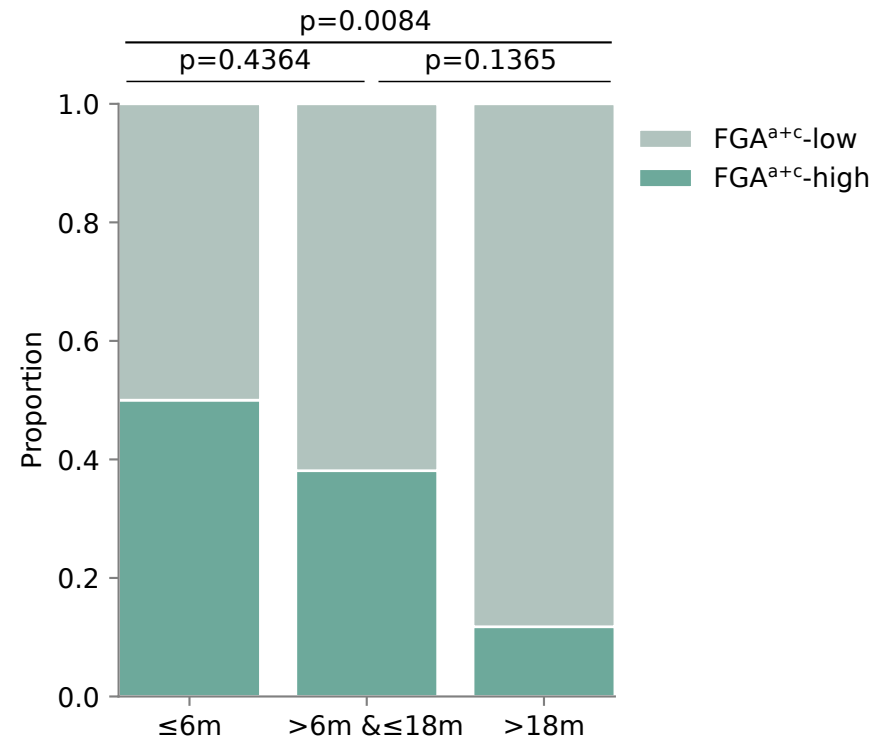

Supplement: Supplementary file 3 [file SuppFigS3.pdf › SuppFiles/SuppFigs/SuppFigS3.pdf]

9p23

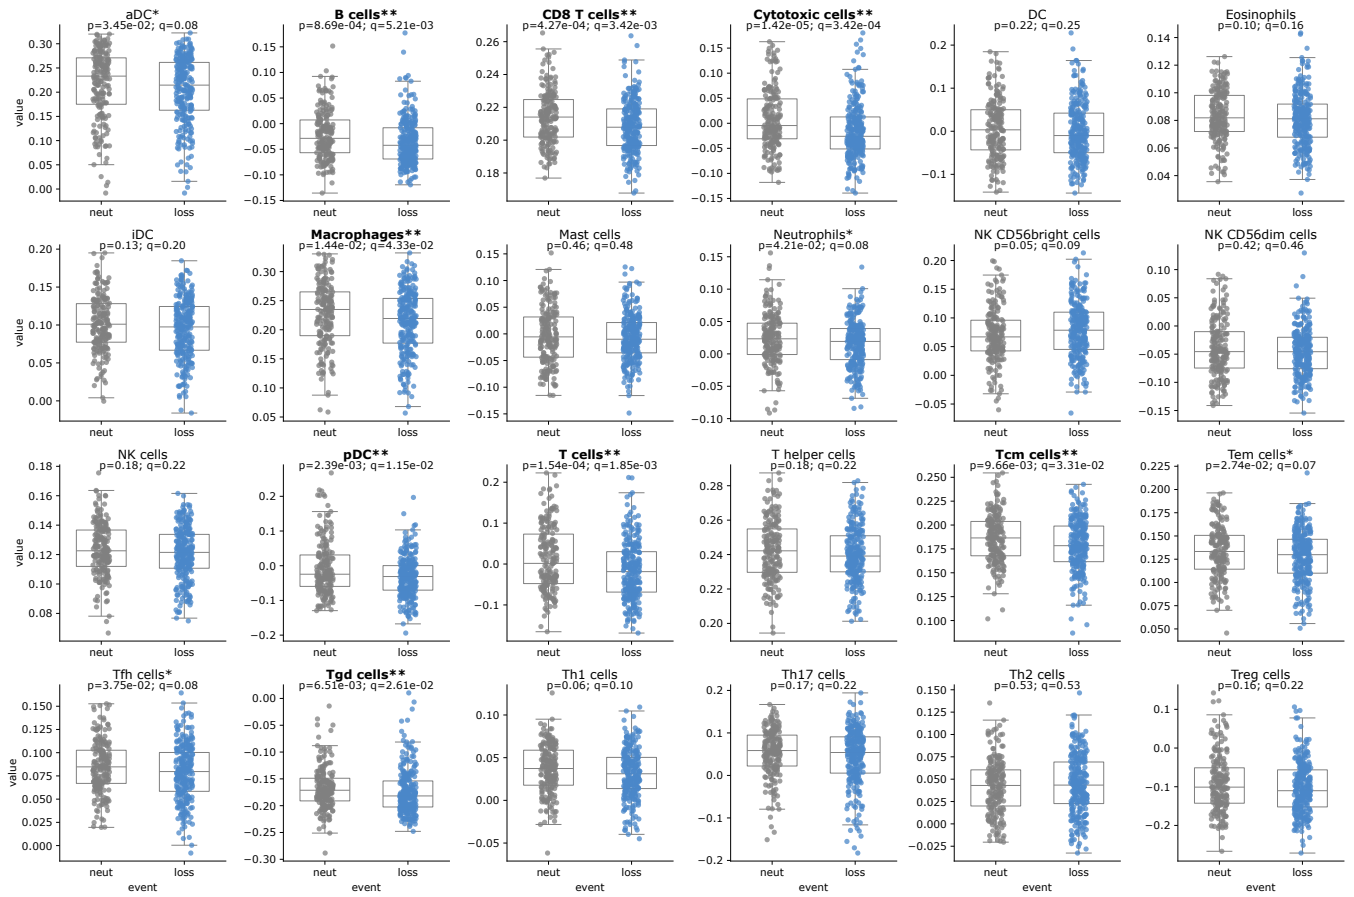

9p21.3

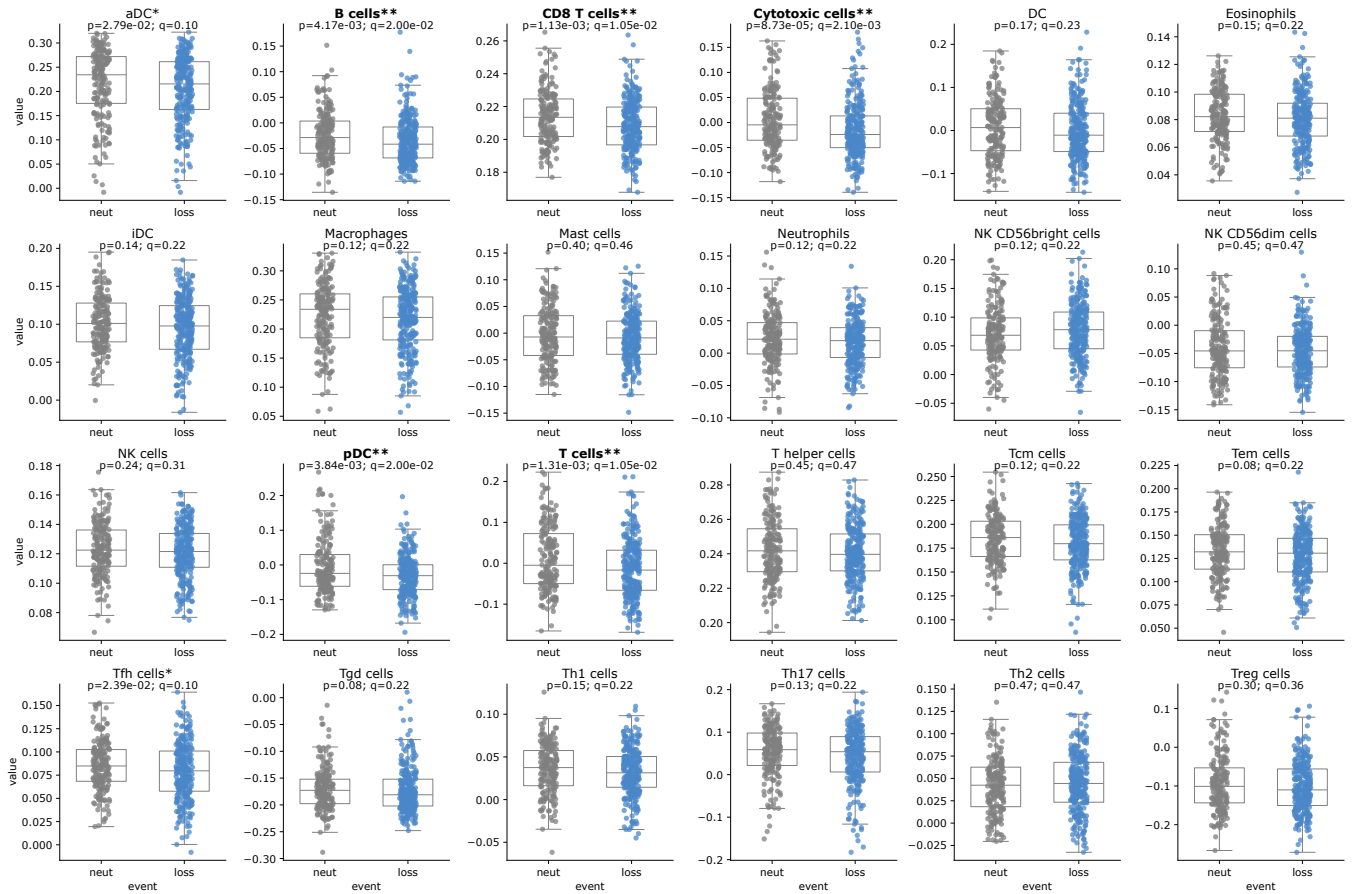

Supplement: Supplementary file 5 [file SuppFigS6.pdf › SuppFiles/SuppFigs/SuppFigS6.pdf]

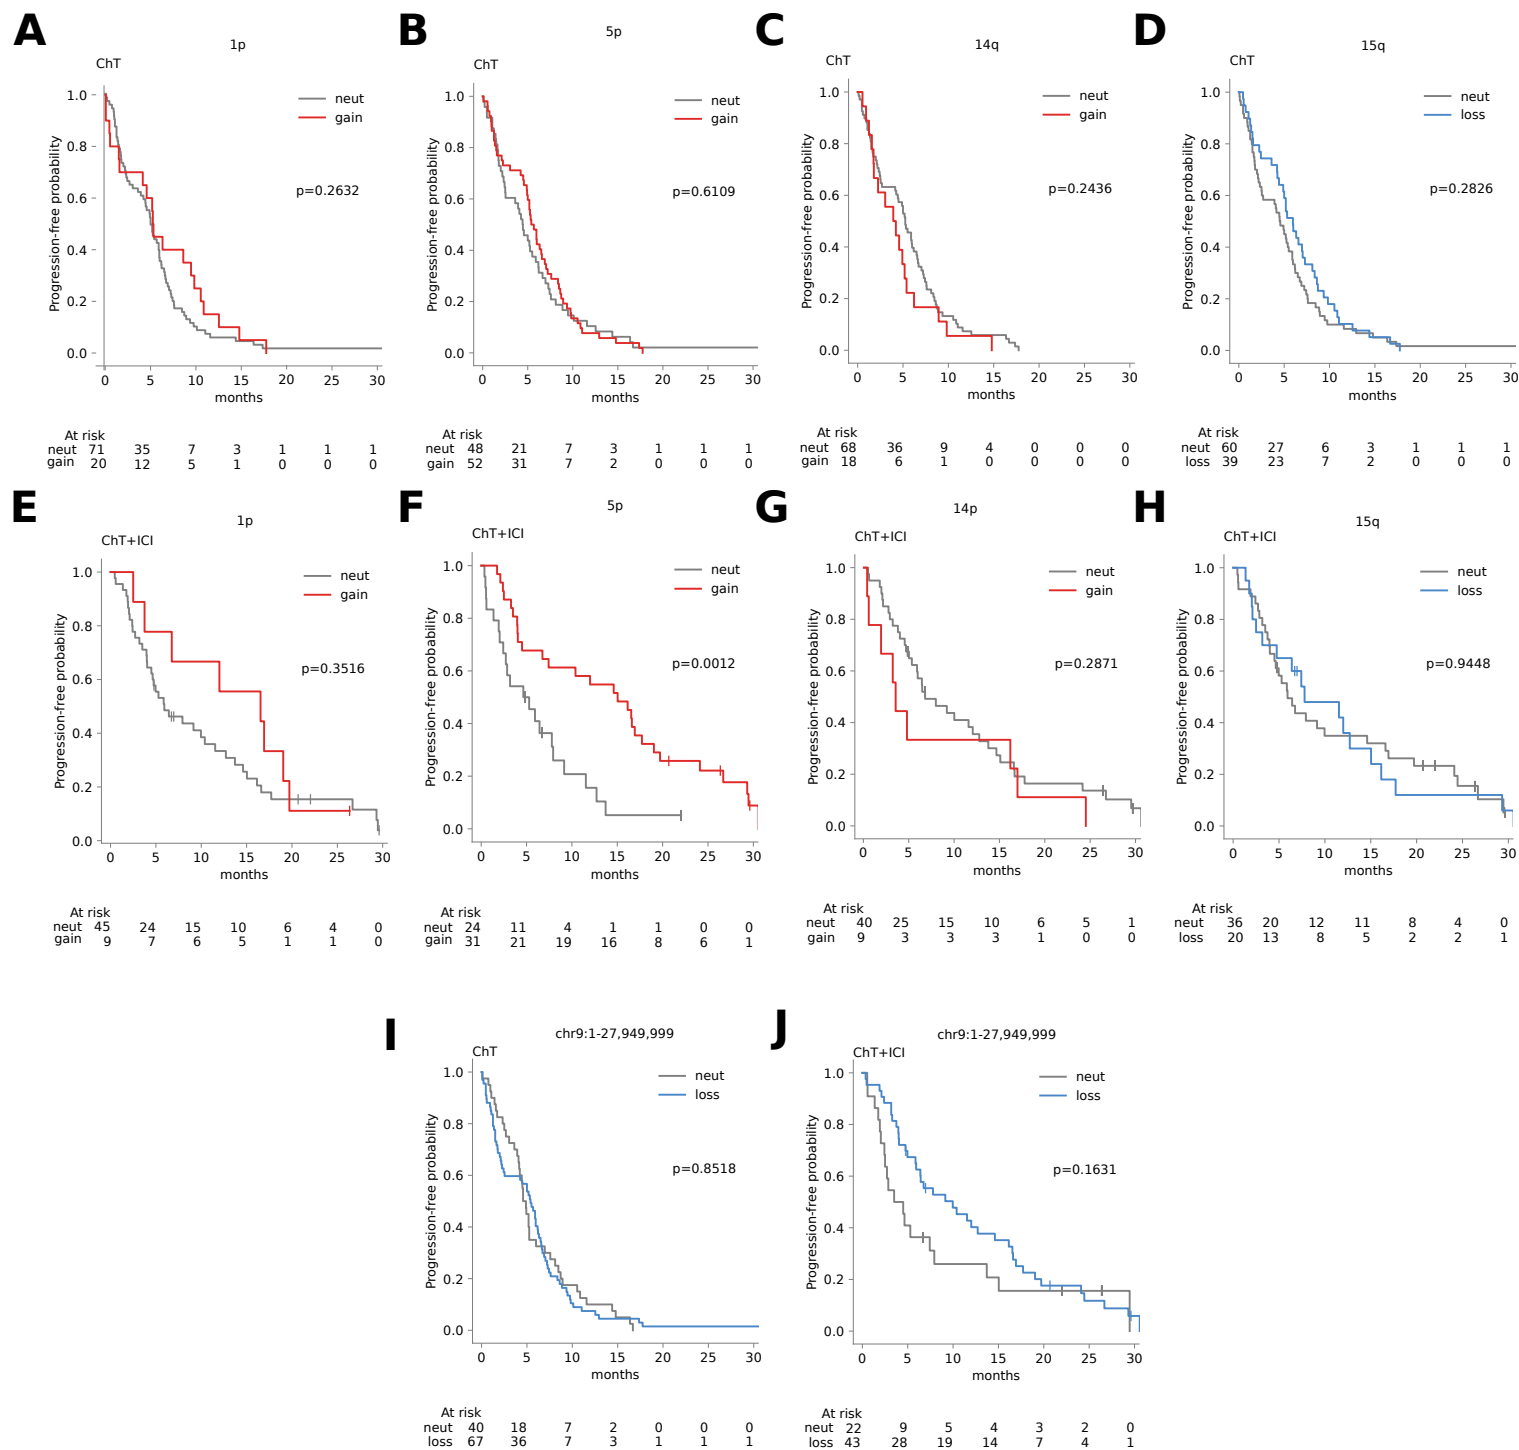

Supplement: Supplementary file 6 [file SuppfigS5.pdf › SuppFiles/SuppFigs/SuppfigS5.pdf]
